# Supplementary material
Source: PubMed Central journal article supplement (PMC3637175)
Supplement: halms619240-supplement_1.pdf [file halms619240-supplement_1.pdf]

**SUPPLEMENTARY ONLINE MATERIAL**

**Reciprocal extreme BMI phenotypes associated with  
gene dosage at the 16p11.2 locus**

**Jacquemont *et al.***

## Supplementary Text

### *Clinical phenotype*

No prenatal effect was documented. The mean birth weight (n=48) was at the 50<sup>th</sup> percentile (3075 g at a mean gestational age of 38.3 weeks). Significant low height was observed in pediatric cases (mostly < 5 years of age) but not in adults. To appreciate the effect on height in children, we assessed longitudinal data available from 14 pediatric patients (data not shown). Decline in weight gain preceded the decline in height gain. In no instance was the reverse true. In several cases, both curves seemed to falter simultaneously. This is a well documented phenomenon in children with “failure to thrive” (FTT) <sup>1</sup>, where early onset weight stagnation has a direct impact on height.

Significant neurological signs were present in 32/95 cases ascertained for DD/ID (including literature cases) (**Supplementary Table S9**, Materials and Methods for details on selection criteria), a similar frequency to that observed for DD/ID deletion carriers (37/165). Weight and BMI were similar ( $p > 0.2$ ) in patients with or without neurological symptoms. Other comorbidities or malformations were infrequent (**Supplementary Table S9**).

### *Double hits*

Six of the 73 duplication carriers (8%) referred for DD/ID exhibited an additional large (> 500 kb) genomic rearrangement, similar to the frequency observed in the general population <sup>2</sup> (**Supplementary Table S2**). A trend for lower frequency of such second hits (3/128; 2%) was found in carriers of the highly-penetrant reciprocal 16p11.2 deletion ( $p = 0.08$  Fisher’s exact test). Our results, therefore, do not support a strong two-hit model expressivity for the 16p11.2 duplication <sup>3</sup>, contrary to findings pertaining to the 16p12.1 microdeletion <sup>4</sup>.

### *Gender bias*

Duplication carriers ascertained through population-based cohorts show a significant excess of females (approximately 2.1F:1M), and the few carrier adult men (n=10) ascertained in this way present BMI and height in the normal range. The most likely explanation for this gender ratio is that our adult ascertainment was biased towards less severe DD/ID/ psychiatric cases.

This is in sharp contrast with the high frequency of moderately to severely underweight males observed in DD/ID children and adults. A similar bias was observed among transmitting parents.

### ***Eating disorder cohort screening***

To further assess the role of the duplication and deletion in the etiology of eating disorders (ED) we screened for 16p11.2 rearrangements in a cohort of 441 patients diagnosed with anorexia, bulimia, binge eating disorder or ED not otherwise specified and 335 controls using Multiplex Ligation-dependent Probe Amplification (**Supplementary Table S10**). We identified an atypical duplication in one patient (AB505) with AN (incidence 1/109) (**Supplementary Figure S4A**). We used quantitative PCR <sup>5</sup> and a custom aCGH that specifically targets a portion of the short arm of chromosome 16 to confirm the rearrangement and pinpoint its extent (Materials and Methods). The patient presents two small independent duplications: one known copy number polymorphism <sup>6</sup> of 104 kb (16:30,081,217-30,185,324), and a second rearrangement, which was not found in 5,612 individuals from the general population (CoLaus cohort), of 136 kb (16:29,514,638-29,650,991) that encompasses the *SPN* and *QPRT* genes (**Supplementary Figure S4B-C**). This atypical duplication carrier patient was a 29-year old female patient with lifetime history of AN measured by SCID-I <sup>7</sup> (disease onset at 16 years; current height = 1.63 m and BMI=18.3; lifetime minimum BMI=17.3 at 27 years). The patient described a presence of one to two bingeing and vomiting episodes per month and regular laxative use.

**Supplementary Table S1: List of genes mapping within the 16p11.2 rearranged interval and its flanks.**

|                                             | unspecific<br>QPCR<br>assay | failed<br>efficiency<br>test | specific<br>QPCR<br>assay | expressed in<br>brain | expressed in<br>hypothalamus |
|---------------------------------------------|-----------------------------|------------------------------|---------------------------|-----------------------|------------------------------|
| <b>genes within the rearranged interval</b> |                             |                              |                           |                       |                              |
| <i>BOLA2/BOLA2B</i>                         | 1                           | 0                            | 0                         | 1                     | 1                            |
| <i>GI1D1/GI1D2</i>                          | 1                           | 0                            | 0                         | 1                     | 1                            |
| <i>SULT1A4/SULT1A3</i>                      | 1                           | 0                            | 0                         | 1                     | 1                            |
| <i>SPN</i>                                  | 1                           | 0                            | 0                         | 1                     | 1                            |
| <i>QPRT</i>                                 | 0                           | 0                            | 1                         | 1                     | 1                            |
| <i>C16orf54</i>                             | 1                           | 0                            | 0                         | 1                     | 1                            |
| <i>MAZ</i>                                  | 0                           | 0                            | 1                         | 1                     | 1                            |
| <i>PRRT2</i>                                | 0                           | 0                            | 1                         | 1                     | 1                            |
| <i>C16orf53</i>                             | 0                           | 0                            | 1                         | 1                     | 1                            |
| <i>MVP</i>                                  | 0                           | 0                            | 1                         | 1                     | 1                            |
| <i>CDIPT</i>                                | 0                           | 0                            | 1                         | 1                     | 1                            |
| <i>SEZ6L2</i>                               | 0                           | 0                            | 1                         | 1                     | 1                            |
| <i>ASPHD1</i>                               | 0                           | 1                            | 0                         | 1                     | 1                            |
| <i>KCTD13</i>                               | 0                           | 0                            | 1                         | 1                     | 1                            |
| <i>TMEM219</i>                              | 0                           | 0                            | 1                         | 1                     | Unknown                      |
| <i>TAOK2</i>                                | 0                           | 0                            | 1                         | 1                     | 1                            |
| <i>HIRIP3</i>                               | 0                           | 0                            | 1                         | 1                     | 1                            |
| <i>INO80E</i>                               | 0                           | 0                            | 1                         | 1                     | Unknown                      |
| <i>DOC2A</i>                                | 0                           | 0                            | 1                         | 1                     | 1                            |
| <i>C16orf92</i>                             | 0                           | 1                            | 0                         | 1                     | Unknown                      |
| <i>FAM57B</i>                               | 0                           | 0                            | 1                         | 1                     | 1                            |
| <i>ALDOA</i>                                | 1                           | 0                            | 0                         | 1                     | 1                            |
| <i>PPP4C</i>                                | 0                           | 0                            | 1                         | 1                     | 1                            |
| <i>TBX6</i>                                 | 0                           | 1                            | 0                         | 1                     | 1                            |
| <i>YPEL3</i>                                | 0                           | 0                            | 1                         | 1                     | 1                            |
| <i>GDPD3</i>                                | 0                           | 0                            | 1                         | 1                     | 1                            |
| <i>MAPK3</i>                                | 0                           | 0                            | 1                         | 1                     | 1                            |
| <i>CORO1A</i>                               | 0                           | 0                            | 1                         | 1                     | 1                            |
| <b>sum</b>                                  | 6                           | 3                            | 19                        |                       |                              |
| <b>telomeric genes</b>                      |                             |                              |                           |                       |                              |
| <i>RUNDC2C</i>                              | 1                           | 0                            | 0                         | Unknown               | Unknown                      |
| <i>LOC653390</i>                            | 1                           | 0                            | 0                         | 1                     | 1                            |
| <i>LAT</i>                                  | 0                           | 0                            | 1                         | 1                     | 1                            |
| <i>SH2B1</i>                                | 0                           | 0                            | 1                         | 1                     | Unknown                      |
| <i>ATXN2L</i>                               | 0                           | 0                            | 1                         | 1                     | Unknown                      |
| <i>EIF3C</i>                                | 1                           | 0                            | 0                         | Unknown               | Unknown                      |
| <i>CLN3</i>                                 | 0                           | 0                            | 1                         | 1                     | 1                            |
| <i>KIAA0556</i>                             | 1                           | 0                            | 0                         | 1                     | 1                            |
| <i>IL21R</i>                                | 1                           | 0                            | 0                         | 1                     | 1                            |
| <i>IL4R</i>                                 | 0                           | 0                            | 1                         | 1                     | 0                            |
| <i>AQP8</i>                                 | 0                           | 1                            | 0                         | 1                     | 1                            |
| <i>HS3ST4</i>                               | 1                           | 0                            | 0                         | 1                     | 1                            |
| <i>ZKSCAN2</i>                              | 1                           | 0                            | 0                         | Unknown               | Unknown                      |
| <b>sum</b>                                  | 7                           | 1                            | 5                         |                       |                              |

| <b>centromeric genes</b> |   |   |   |         |         |
|--------------------------|---|---|---|---------|---------|
| <i>SEPT1</i>             | 0 | 0 | 1 | 1       | 1       |
| <i>ZNF688</i>            | 0 | 0 | 1 | Unknown | Unknown |
| <i>BCL7C</i>             | 0 | 0 | 1 | Unknown | Unknown |
| <i>POL3S</i>             | 0 | 1 | 0 | Unknown | Unknown |
| <i>ITGAD</i>             | 0 | 1 | 0 | 1       | 1       |
| <b>sum</b>               | 0 | 2 | 3 |         |         |

**Supplementary Table S2: List of 16p11.2 duplication and deletion carriers presenting a second large (>500kb) genomic rearrangement.**

| ID  | gender | 16p11.2 rearrangement |                | Second hit                         |         |                |
|-----|--------|-----------------------|----------------|------------------------------------|---------|----------------|
|     |        | CNV                   | Inheritance    | locus                              | Size    | Inheritance    |
| 169 | F      | dup                   | father         | dup 22q11.2(mat) + del 5q23.1(mat) | 2864 kb | mother         |
| 209 | M      | dup                   | <i>de novo</i> | del 2q33.2q33.3                    | 3640 kb | unknown        |
| 253 | F      | dup                   | father         | del 15q13.2                        | 1500 kb | father         |
| 3   | M      | dup                   | mother         | del 19q13.42                       | 622 kb  | unknown        |
| 315 | M      | dup                   | mother         | del 9q34.3                         | 506 kb  | <i>de novo</i> |
| 349 | F      | dup                   | mother         | del 19p13.3                        | 1000 kb | <i>de novo</i> |
| 324 | F      | dup                   | father         | del 10q11.22q11.23                 | 5100 kb | father         |
| 93  | M      | del                   | father         | dup 15q13.2q13.3                   | 1980 kb | mother         |
| 198 | M      | del                   | father         | del 10p15                          | 1890 kb | <i>de novo</i> |
| 215 | M      | del                   | father         | 3q25.31                            | 662 kb  | mother         |

**Supplementary Table S3: Genetic centers and anthropometric measures of 16p11.2**

| Ascertainment              | ID     | Origin   | gender | Age years | Weight |         | Height  |         | BMI               |         | HC     |         | CNV detection platform                                                                                                    |
|----------------------------|--------|----------|--------|-----------|--------|---------|---------|---------|-------------------|---------|--------|---------|---------------------------------------------------------------------------------------------------------------------------|
|                            |        |          |        |           | kg     | Z-score | cm      | Z-score | kg/m <sup>2</sup> | Z-score | cm     | Z-score |                                                                                                                           |
| Adult psychiatry           | 124    | Rouen    | F      | 41        | 91     | 2.4334  | 172     | -0.3186 | 30.33             | 1.753   |        |         | QMPSF and FISH                                                                                                            |
|                            | 125    | Rouen    | M      | 22        | 55     | -2.7118 | 175     | -0.3186 | 17.9              | -3.1346 |        |         |                                                                                                                           |
|                            | 126    | Rouen    | F      |           |        |         |         |         |                   |         |        |         |                                                                                                                           |
|                            | 267    | Rouen    | F      | 21        | 54     | -0.75   | 180     | 2.9631  | 16.66             | -3.2154 |        |         |                                                                                                                           |
| Developmental Delay/Autism | 369    | Iceland  | F      | 9         |        |         |         |         |                   |         |        |         | Illumina Human317 or<br>Illumina Human 370 or<br>Illumina HumanHap550 or<br>Illumina Human610 or<br>Illumina 1M BeadChips |
| Developmental Delay        | 32     | Amiens   | M      | 9         | 16.5   | -4.9333 | 118     | -3.5446 | 11.87             | -4.225  |        | -4      | Agilent 44K                                                                                                               |
|                            | 314    | Amiens   | M      | 3         | 9.24   | -4.5007 | 85.5    | -2.5356 | 12.8              | -3.6752 | 44     | -3.8458 |                                                                                                                           |
|                            | 346    | Angers   | M      | 12        | 33     | -0.75   | 146     | -0.25   | 15.5              | -0.93   | 52.5   | -1      | Illumina 610K                                                                                                             |
|                            | 38     | Antwerp  | M      | 30        | 82.9   | -0.52   | 174.5   | -1.25   | 27.22             | 0.321   | 56     | -0.3186 | Illumina Human 370 CNV<br>Quad Chip                                                                                       |
|                            | 21     | Bordeaux | M      | 5.42      | 25.5   | 1.8048  | 122     | 2.1819  | 17.23             | 1.514   | 52     | -0.3186 | Agilent 105K                                                                                                              |
|                            | 373    | Bordeaux | M      | 21        | 64     | -1.0533 | 193     | 2.8112  | 17.2              | -3.8047 | 55     |         | Agilent 244K                                                                                                              |
|                            | 173    | Boston   | M      | 2         |        |         |         |         |                   |         |        |         | Agilent 244K                                                                                                              |
|                            | 174    | Boston   | F      | 10.5      | 22.3   | -2.7313 | 126.7   | -2.0712 | 14.11             | -1.709  | 52     | -0.3186 |                                                                                                                           |
|                            | 175    | Boston   | F      | 10.3      | 30.5   | -0.67   | 135     | -0.9346 | 16.7              | -0.14   | 52     | -0.3186 |                                                                                                                           |
|                            | 176    | Boston   | F      | 1         | 5.85   | -4.9    | 71.8    | -0.9346 | 11.5              | -4.5    | 45.5   | 0.3186  |                                                                                                                           |
|                            | 177    | Boston   | F      | 5         |        |         |         |         |                   |         | 50     | -0.6745 |                                                                                                                           |
|                            | 178    | Boston   | M      | 8.8       | 27     | -0.15   | 130.3   | -0.2793 | 15.9              | -0.09   | 52.5   | -0.3186 |                                                                                                                           |
|                            | 179    | Boston   | M      | 10.3      | 29.5   | -0.67   | 133.1   | -0.9346 | 16.7              | -0.06   |        |         |                                                                                                                           |
|                            | 180    | Boston   | M      | 5.7       | 20.1   | 0       | 110.7   | -0.6745 | 16.4              | 0.729   | 51     | -0.3186 |                                                                                                                           |
| 181                        | Boston | M        | 1.5    | 11.8      | -1.28  | 81.5    | 0       | 18.1    | 0.675             | 49.5    | 1.2816 |         |                                                                                                                           |
| 182                        | Boston | M        | 6.1    | 21.8      | -0.32  | 116.2   | -0.3186 | 16.1    | 0.53              | 52.4    | 0.6745 |         |                                                                                                                           |
| 184                        | Boston | F        | 5.9    | 18.5      | -0.32  | 112.3   | -0.3186 | 14.7    | -0.4              |         |        |         |                                                                                                                           |

|     |          |   |      |            |         |       |         |       |         |           |         |                                           |
|-----|----------|---|------|------------|---------|-------|---------|-------|---------|-----------|---------|-------------------------------------------|
| 185 | Boston   | F | 1    | 9.7        | 0.319   | 74.1  | 0       | 17.6  | 0.75    | 42        | -2.1313 |                                           |
| 186 | Boston   | F | 16.8 | 92         | 2.059   | 174.1 | 1.5141  | 30.4  | 1.7     |           |         |                                           |
| 187 | Boston   | M | 1    | 11.3       | 0.935   | 76    | 0.3186  | 19.8  | 2       | 47.7<br>5 | 0.9346  |                                           |
| 188 | Boston   | M | 11   | 32.1       | -0.84   | 136.5 | -1.2816 | 17.2  | 0.01    | 53.5      | -0.3186 |                                           |
| 31  | Caen     | F | 15   | 36.3       | -3.8022 | 149   | -2.5376 | 16.35 | -1.64   | 51        | -1.5141 | Agilent 44K                               |
| 292 | Canada   | M | 11.9 | 48         | 0.935   | 150   | 0.3186  | 21.3  | 1.1     | 52        | -1.2816 | Agilent 44K/Affymetrix 6.0                |
| 259 | Erlangen | M | 9    | 27.5       | -0.25   | 135.6 | 1       | 15.2  | -0.67   | 49        | -2.5758 | Affymetrix Genechip 6.0 Mapping SNP-array |
| 262 | Erlangen | F | 5.2  | 27         | 2.1466  | 126   | 3.2787  | 17    | 1.514   | 51        | 0       | Affymetrix Genechip 6.0 Mapping SNP-array |
| 359 | Graz     | M | 17.5 | 73         | 1.5     | 153   | -3.5    | 31.2  | 2       |           |         | Agilent 60K                               |
| 360 | Graz     | M | 23   | 55         | -3.2649 | 160   | -3.5142 | 21.48 | -0.8    | 51        | -2.3263 | Agilent 44K                               |
| 362 | Graz     | M | 13   | 55         | 1.75    | 165   | 1.25    | 20.22 | 0.6     | 55        | 0       | Agilent 60K                               |
| 319 | Grenoble | M | 12.8 |            |         | 150   | -0.25   |       |         |           |         | Agilent 180K                              |
| 367 | Helsinki | M | 13.6 | 44.2       | -0.25   | 157.2 | -0.25   | 16.25 | -1.25   | 51.5      | -3      | Agilent 244K                              |
| 123 | Le Havre | F | 3    | 14.5       | 0.319   | 94.5  | 0.75    | 16.3  | 0.41    | 49.7      | 0.3186  | QMPSF and FISH                            |
| 14  | Lille    | F | 8.5  | 27.1       | 0.5     | 131   | 0.75    | 15.8  | 0       | 54.5      | 2.0537  |                                           |
| 33  | Lille    | M | 12.6 | 38         | -0.25   | 162   | 1.5     | 14.5  | -1.88   |           |         |                                           |
| 37  | Lille    | M | 0    |            |         |       |         |       |         |           |         |                                           |
| 137 | Lille    | F | 5    | 15.2       | -1      | 102   | -1      | 14.5  | -0.67   | 49.5      | -0.9346 |                                           |
| 190 | Lille    | M | 17   | 28         | -4      |       |         | 16    | -3.7568 |           | -1.2816 | Agilent 44K                               |
| 193 | Lille    | M | 1.6  | 7.18       | -3.5    | 77.5  | -1      | 11.9  | -5.63   | 43        | -3.4552 |                                           |
| 313 | Lille    | F | 7.5  | 16.2       | -3.7444 | 106   | -3.25   | 14.46 | -0.67   | 45.5      | -3      |                                           |
| 315 | Lille    | M |      |            |         |       |         |       |         |           |         |                                           |
| 385 | Lille    | F | 2.75 | 13.5       | 0.25    | 94    | 1       | 15.34 | 0       |           |         |                                           |
| 170 | Lyon     | M | 4    | 14.9       | -1      | 96.1  | -1.25   | 16.19 | 0.319   | 50.5      | -0.6745 | Agilent 180K                              |
| 17  | Nancy    | M | 2.83 | 11         | -2.409  | 94.5  | 1       | 12.32 | -4.4635 | 49        | -0.9346 | QPCR and Agilent 105K                     |
| 19  | Nancy    | F | 3.08 | 12.09<br>6 | -1      | 88.5  | -1      | 15.4  | -0.32   | 43        | -3.9285 | Agilent 105K                              |
| 253 | Nantes   | F | 1.75 | 10.3       | -0.5    | 78    | -0.75   | 17.16 | 0.319   | 45        | -1.2515 | Agilent 180K                              |



|                    |     |            |   |      |      |             |       |             |       |             |      |         |                             |                                                                                                               |
|--------------------|-----|------------|---|------|------|-------------|-------|-------------|-------|-------------|------|---------|-----------------------------|---------------------------------------------------------------------------------------------------------------|
|                    | 135 | Nijmegen   | F | 3.2  | 17.5 | 1.5627      | 100.5 | -0.25       | 17.33 | 1.282       | 49   | -0.6745 | Affymetrix 250K SNP array   |                                                                                                               |
|                    | 206 | Nijmegen   | M | 0.6  | 7.24 | -1          | 67    | -1          | 16.09 | -0.25       | 43   | -1.7411 |                             |                                                                                                               |
|                    | 219 | Nijmegen   | M | 52   | 75   | -0.5175     | 183   | 1.5         | 22.39 | -1.147      | 52   | -2      |                             |                                                                                                               |
|                    | 220 | Nijmegen   | F | 14   | 56.5 | 1.25        | 158   | -1          | 22.7  | 1.1         | 55.1 | 1.2816  |                             |                                                                                                               |
|                    | 357 | Nijmegen   | F | 12.8 | 32.5 | -1.5        | 151.5 | -1.25       | 14.25 | -2.0494     | 55   | 1.5141  |                             |                                                                                                               |
|                    | 164 | Paris      | M | 9    | 21   | -1.75       | 122   | -1.25       | 14.1  | -1.51       | 48   | -2.5758 | Illumina HumanCytoSNP-12 v2 |                                                                                                               |
|                    | 322 | Paris      | M | 5.5  | 22   | 1.5         | 107   | -1          | 19.1  | 2.0194      | 48   | -3      |                             |                                                                                                               |
|                    | 349 | Paris      | F | 6.4  | 13   | -3          | 99    | -3.5        | 13.2  | -1.51       | 45.5 | -2.5    | Agilent 180K                |                                                                                                               |
|                    | 286 | Reims      | M | 3    | 9    | -4.8104     | 82    | -3.5267     | 13.4  | -2.9182     |      |         | Agilent 105K                |                                                                                                               |
|                    | 287 | Reims      | M |      |      |             |       |             |       |             |      |         |                             |                                                                                                               |
|                    | 209 | Rennes     | M | 0    |      |             |       |             |       |             |      |         | Agilent 44K                 |                                                                                                               |
|                    | 133 | Rouen      | F | 5.8  | 23   | 1.5         | 116   | 1           | 17.1  | 1.514       | 52.4 | 0.9346  | QMPSF and FISH              |                                                                                                               |
|                    | 213 | Siena      | M | 13   | 65   | 2.2073      | 170   | 1.1514      | 22.5  | 1.7369      | 55.5 | 0.9346  | Agilent 44K                 |                                                                                                               |
|                    | 143 | ST-Etienne | M | 2    | 9.5  | -3.3773     | 83    | -1          | 13.8  | -2.5217     | 43   | -3.8581 | Agilent 105K                |                                                                                                               |
|                    | 324 | Strasbourg | F | 10   | 25.6 | -1          | 132   | -0.5        | 14.7  | -0.93       | 50   | -2      | Agilent 105K                |                                                                                                               |
|                    | 3   | Tessin     | M | 5.5  | 23   | 1.282       | 120.2 | 1.282       | 16    | 0.319       | 51.5 | -0.3186 | Agilent 244K                |                                                                                                               |
|                    | 168 | Utrecht    | F | 16   |      |             |       | -1.25       |       |             |      | 1.5     | Agilent 105K                |                                                                                                               |
|                    | 169 | Utrecht    | F | 16   | 64   | 1.098       | 183   | 3.6605      | 19.1  | -0.32       | 55   | 0       |                             |                                                                                                               |
| General population | 79  | Estonia    | F | 24   | 52   | -1.82       | 165   | 0.1375      | 19.1  | -1.63       |      |         | Illumina CNV370-Duo         |                                                                                                               |
|                    | 80  | Estonia    | F | 20   | 49   | -0.96       | 167   | 0.8535      | 17.6  | -1.61       |      |         |                             |                                                                                                               |
|                    | 350 | Germany    | F | 69   | 61.9 | -1.04611143 | 156   | -1.37067533 | 25.44 | -0.38678363 |      |         | Affymetrix 6.0              |                                                                                                               |
|                    | 398 | Germany    | M | 60   | 83.1 | -0.1590729  | 172.9 | -0.2830262  | 27.8  | 0.0840356   |      |         |                             |                                                                                                               |
|                    | 399 | Germany    | M | 72   | 85.6 | 0.1576615   | 162.8 | -1.29606    | 32.3  | 0.8730889   |      |         |                             |                                                                                                               |
|                    | 297 | Iceland    | F | 23   |      |             |       |             |       |             |      |         |                             | Illumina Human317 or Illumina Human 370 or Illumina HumanHap550 or Illumina Human610 or Illumina 1M BeadChips |
|                    | 298 | Iceland    | F | 69   | 69   | -0.176815   | 162   | -0.502784   | 26.3  | 0.079308    |      |         |                             |                                                                                                               |
|                    | 299 | Iceland    | F | 28   | 70   | 0.297591    | 174   | 0.835626    | 23.2  | -0.051204   |      |         |                             |                                                                                                               |
|                    | 300 | Iceland    | F | 38   | 88.3 | 1.181066    | 175   | 1.195358    | 28.8  | 0.818679    |      |         |                             |                                                                                                               |
|                    | 301 | Iceland    | F | 55   | 51   | -2.10249    | 165   | -0.246      | 18.7  | -2.121784   |      |         |                             |                                                                                                               |
|                    | 302 | Iceland    | F | 90   | 58.2 | -0.677843   | 161   | -0.195263   | 22.45 | -0.837061   |      |         |                             |                                                                                                               |
|                    | 303 | Iceland    | F | 47   | 65   | -0.423469   | 176   | 1.457103    | 20.98 | -1.061948   |      |         |                             |                                                                                                               |

|                                              |     |               |   |      |      |           |       |           |       |           |      |                               |                                           |
|----------------------------------------------|-----|---------------|---|------|------|-----------|-------|-----------|-------|-----------|------|-------------------------------|-------------------------------------------|
|                                              | 304 | Iceland       | F | 105  |      |           |       |           |       |           |      |                               |                                           |
|                                              | 305 | Iceland       | F | 49   | 63   | -0.751296 | 165   | -0.170372 | 23.14 | -0.648291 |      |                               |                                           |
|                                              | 306 | Iceland       | F | 25   |      |           |       |           |       |           |      |                               |                                           |
|                                              | 307 | Iceland       | M | 46   | 90   | 0.150439  | 174   | -1.110929 | 29.73 | 0.698929  |      |                               |                                           |
|                                              | 308 | Iceland       | F | 34   | 62   | -0.477831 | 171   | 0.397718  | 21.2  | -0.709787 |      |                               |                                           |
|                                              | 309 | Iceland       | F | 57   | 85.5 | 0.916853  | 166   | -0.093395 | 31.03 | 0.995875  |      |                               |                                           |
|                                              | 310 | Iceland       | M | 52   |      |           |       |           |       |           |      |                               |                                           |
|                                              | 311 | Iceland       | F | 54   | 62   | -0.824953 | 170   | 0.61074   | 21.45 | -1.121701 |      |                               |                                           |
|                                              | 312 | Iceland       | F | 9    |      |           |       |           |       |           |      |                               |                                           |
|                                              | 365 | Iceland       | F | 48   | 74   | 0.236966  | 175   | 1.379613  | 26.78 | 0.346145  |      |                               |                                           |
|                                              | 351 | Lausanne      | M | 50.7 | 70.3 | -1.28     | 173   | -0.5982   | 23.5  | -0.5934   |      |                               |                                           |
|                                              | 352 | Lausanne      | F | 56.6 | 52.4 | -1.48     | 150   | -3.1262   | 23.3  | -0.1831   |      |                               |                                           |
|                                              | 353 | Lausanne      | M | 56.7 | 92   | 0.97      | 183   | 1.7837    | 27.5  | 0.616     |      | Affymetrix Mapping 500K array |                                           |
|                                              | 354 | Lausanne      | M | 53.8 | 78.4 | 0         | 176   | 0.1982    | 25.3  | -0.0212   |      |                               |                                           |
|                                              | 355 | Lausanne      | F | 69.3 | 70.5 | 0.682     | 164   | 0.6584    | 26.2  | 0.4416    |      |                               |                                           |
|                                              | 127 | North Finland | F | 31   | 59.4 | -0.39     | 160.1 | -0.7488   | 23.17 | 0.005     |      |                               |                                           |
|                                              | 128 | North Finland | M | 31   | 88.2 | 0.762     | 181.4 | 0.5015    | 26.8  | 0.589     |      |                               |                                           |
|                                              | 129 | North Finland | M | 31   | 80.5 | 0.148     | 179.8 | 0.2533    | 24.9  | 0         |      | Illumina CNV370-Duo           |                                           |
|                                              | 130 | North Finland | M | 31   | 79.3 | 0.048     | 177.5 | -0.1181   | 25.17 | 0.095     |      |                               |                                           |
| Relative of Proband with Developmental Delay | 183 | Boston        | M | 3.2  | 15.2 | 0.319     | 94.5  | -0.6745   | 17    | 0.882     | 50   | 0                             | Agilent 244K                              |
|                                              | 191 | Caen          | F | 51   | 50   | -1.15     | 165   | 0.25      | 18.3  | -1.9526   |      |                               | Agilent 44K                               |
|                                              | 291 | Canada        | F | 44   | 67.5 | 0.522     | 159.5 | -0.6745   | 26.5  | 0.879     |      |                               | Affymetrix 500K Array                     |
|                                              | 260 | Erlangen      | F | 36   | 59.5 | -1.3677   | 158   | -0.9346   | 23.83 | -0.5104   | 52   | -1.5141                       | Affymetrix Genechip 6.0 Mapping SNP-array |
|                                              | 361 | Graz          | M | 50   | 62   | -1.9089   | 173.5 | -0.25     | 20.6  | -1.8717   | 55   | -0.9346                       | Agilent 44K                               |
|                                              | 18  | Nancy         | F | 1.25 | 7.9  | -4.7857   | 72.5  | -1.2816   | 15.1  | -1.51     | 43.2 | -1.7889                       | QPCR                                      |
|                                              | 254 | Nantes        | M | 40   | 48   | -4.8345   | 165   | -1.75     | 17.6  | -3.8203   |      |                               | FISH                                      |
|                                              | 356 | Nijmegen      | M | 42   | 72   | -1.68     | 187   | 0.25      | 20.63 | -1.7768   |      |                               | Affymetrix 250K SNP array                 |

|     |            |   |    |      |       |       |         |      |       |    |  |         |                             |
|-----|------------|---|----|------|-------|-------|---------|------|-------|----|--|---------|-----------------------------|
| 323 | Paris      | F | 28 | 61   | 0.306 | 160.7 | -0.5    | 23.6 | -0.11 |    |  |         | Illumina HumanCytoSNP-12 v2 |
| 134 | Rouen      | F | 36 | 51   | -1.35 | 160   | -0.9346 | 19.9 | -1.09 |    |  |         | QMPSF and FISH              |
| 142 | ST-Etienne | M | 36 | 71.5 | -0.72 | 170   | -0.9346 | 24.7 | -0.16 |    |  | -4      | QMPSF and FISH              |
| 4   | Tessin     | F | 34 | 61   | 0.132 | 164.7 | 0       | 22.5 | -0.24 | 53 |  | -0.9346 | FISH                        |

Data were not available for all cases shown in table 1.

**Supplementary Table S4: Literature cases, anthropometric measures of carriers of the 16p11.2 duplication (29.5-30.1 Mb)**

| Reference                     | ID   | ID Literature          | Gender | Age years | Weight  |         | Height |         | BMI               |          | Head Circumference |         |
|-------------------------------|------|------------------------|--------|-----------|---------|---------|--------|---------|-------------------|----------|--------------------|---------|
|                               |      |                        |        |           | kg      | Z-score | cm     | Z-score | kg/m <sup>2</sup> | Z-score  | cm                 | Z-score |
| Fernandez et al <sup>64</sup> | 66   | Proband 4              | M      | 15.5      | 38.1    | -2.8597 | 155    | -1.6449 | 15.86             | -2.3231  | 54.5               | 0       |
|                               | 67   | Proband 5              | F      | 13        | 29.3    | -2.7914 | 145.5  | -1.6449 | 13.84             | -2.57289 | 52                 | 0       |
|                               | 68   | Proband 6              | F      | 2.17      | 11.3    | -0.67   | 82     | -1.2816 | 16.81             | 0.319    | 46.5               | -1.2816 |
| Weiss et al <sup>16</sup>     | 87   | CHBDup1                | M      | 1.17      | 11      | 0.675   |        |         |                   |          |                    |         |
|                               | 88   | CHBDup2                | F      | 3.25      | 14.7    | 0.319   | 97.2   | 0.3186  | 15.56             | 0        | 46.5               | -1.2816 |
|                               | 90   | CHBDup4                | F      | 9.75      | 33.5    | 0.319   |        |         |                   |          | 51                 | -0.9346 |
| McCarthy et al <sup>65</sup>  | 100  | 03C15581               | M      | 62        | 99.79   | 1.184   | 185.42 | 0.9346  | 28.9              | 0.58     |                    |         |
|                               | 101  | 03C15896               | M      | 44        | 58.06   | -2.0091 | 182.88 | 0.6745  | 17.3              | -2.7623  |                    |         |
|                               | 102  | AU002903               | M      | 15.46     | 69.4    | 0.935   | 179.07 | 0.9542  | 21.7              | 0.583    | 54.8               | -0.6745 |
|                               | 103  | AU002904               | F      | 13.36     | 49.44   | 0.319   | 156.21 | 1.562   | 20.2              | 0.413    | 53.3               | -0.3186 |
|                               | 104  | AU002905               | F      | 11.94     | 39.46   | 0       | 153.67 | 0.3186  | 16.8              | -0.54    | 53.4               | 0.3186  |
|                               | 105  | AU011004               | M      | 11.04     |         |         |        |         |                   |          | 53.5               | 0       |
|                               | 111  | Rap-2011               | F      | 15        | 48.1    | -0.32   | 152.4  | -1.47   | 20.9              | 0.253    | 54                 | 0       |
|                               | 112  | Rap-676                | F      | 13        | 34.5    | -1.64   | 157.5  | 0       | 14                | -2.5927  | 52.5               | -0.6745 |
| Shinawi et al <sup>66</sup>   | 113* | Shinawi et al 1        | M      | 9         | 30.0628 | 0.3     | 1.2803 | -0.9    | 18.3398           | 0.9509   |                    | 0       |
|                               | 114* | Shinawi et al 2        | M      | 5         | 14.6089 | -2      | 1.0424 | -1      | 13.4438           | -2.1775  |                    | -1.9    |
|                               | 115* | Shinawi et al 3-Mother | F      | 31        | 78.2642 | 1       | 1.7269 | 2       | 26.2429           | 0.6212   |                    | -1.9    |
|                               | 116* | Shinawi et al 4        | F      | 13        | 45.8207 | 0       | 1.6472 | 1.1     | 16.8875           | -0.7533  |                    | -1.2    |
|                               | 117* | Shinawi et al 5        | M      | 7         | 18.9768 | -1.5    | 1.1107 | -2      | 15.3816           | -0.088   |                    | -2.6    |
|                               | 118* | Shinawi et al 6-Mother | F      | 27        | 44.6218 | -1.88   | 1.6089 | -0.84   | 17.2375           | -1.8242  |                    | -2.6    |
|                               | 119* | Shinawi et al 7        | F      | 4         | 15.7932 | 0       | 0.9647 | -1      | 16.9706           | 1.1276   |                    | -3.6    |
|                               | 120* | Shinawi et al 8        | M      | 13        | 47.4479 | 0.2     | 1.5061 | -0.7    | 20.9182           | 0.8137   |                    | 1.1     |
|                               | 121* | Shinawi et al 9        | M      | 11        | 46.5158 | 1.2     | 1.4705 | 0.5     | 21.5113           | 1.3472   |                    | 2.9     |
|                               | 122* | Shinawi et al 10       | M      | 5.5       | 1.2     | 1.2     | 1.1505 | 0.6     | 17.5938           | 1.4053   |                    | -2.5    |

\*Weight, height, BMI and BMI z-scores were imputed from literature z-scores for weight and height

**Supplementary Table S5: Effect of the duplication on BMI, weight and height stratified by gender, condition and age.**

|        |               | Combined     |                 |                | DD/ID or psychiatric <sup>2</sup> |                 |                | Non medically ascertained <sup>3</sup> |                 |                |
|--------|---------------|--------------|-----------------|----------------|-----------------------------------|-----------------|----------------|----------------------------------------|-----------------|----------------|
| Strata |               |              |                 |                |                                   |                 |                |                                        |                 |                |
|        |               | Mean Z-score | <i>p</i> -value | N <sup>1</sup> | Mean Z-score                      | <i>p</i> -value | N <sup>1</sup> | Mean Z-score                           | <i>p</i> -value | N <sup>1</sup> |
| BMI    | All           | -0.47        | <b>2.0e-03</b>  | 102            | -0.56                             | <b>4.1e-03</b>  | 76             | -0.45                                  | <b>6.0e-03</b>  | 40             |
|        | Male          | -0.54        | <b>2.1e-02</b>  | 52             | -0.71                             | <b>1.3e-02</b>  | 43             | -0.31                                  | 2.0e-01         | 14             |
|        | Female        | -0.4         | <b>1.8e-02</b>  | 50             | -0.37                             | 8.3e-02         | 33             | -0.52                                  | <b>4.2e-03</b>  | 26             |
|        | Adult         | -0.63        | <b>1.0e-03</b>  | 47             | -1.36                             | 3.7e-02         | 9              | -0.45                                  | <b>6.2e-03</b>  | 38             |
|        | Male          | -0.8         | <b>1.6e-02</b>  | 20             | -1.54                             | 2.8e-02         | 7              | -0.41                                  | 1.5e-01         | 13             |
|        | Female        | -0.49        | <b>1.5e-02</b>  | 27             | -0.73                             | 4.1e-01         | 2              | -0.48                                  | <b>7.8e-03</b>  | 25             |
|        | Pediatric <18 |              |                 |                | -0.45                             | <b>1.9e-02</b>  | 67             | -0.31                                  | 4.2e-01         | 2              |
|        | Male          |              |                 |                | -0.55                             | 5.8e-02         | 36             | 0.88                                   |                 | 1              |
|        | Female        |              |                 |                | -0.34                             | 9.0e-02         | 31             | -1.51                                  |                 | 1              |
| Weight | All           | -0.56        | <b>4.4e-04</b>  | 104            | -0.65                             | <b>1.3e-03</b>  | 78             | -0.61                                  | <b>3.0e-03</b>  | 40             |
|        | Male          | -0.64        | <b>5.8e-03</b>  | 53             | -0.79                             | <b>4.4e-03</b>  | 44             | -0.57                                  | 8.8e-02         | 14             |
|        | Female        | -0.47        | <b>1.7e-02</b>  | 51             | -0.47                             | 6.5e-02         | 34             | -0.63                                  | <b>8.6e-03</b>  | 26             |
|        | Adult         | -0.58        | <b>1.8e-03</b>  | 47             | -0.8                              | 1.1e-01         | 9              | -0.53                                  | <b>4.3e-03</b>  | 38             |
|        | Male          | -0.86        | <b>1.0e-02</b>  | 20             | -1.27                             | 3.4e-02         | 7              | -0.64                                  | 7.9e-02         | 13             |
|        | Female        | -0.37        | 4.3e-02         | 27             | 0.84                              | 6.5e-01         | 2              | -0.46                                  | <b>1.1e-02</b>  | 25             |
|        | Pediatric <18 |              |                 |                | -0.63                             | <b>3.1e-03</b>  | 69             | -2.23                                  | 2.7e-01         | 2              |
|        | Male          |              |                 |                | -0.7                              | <b>1.9e-02</b>  | 37             | 0.32                                   |                 | 1              |
|        | Female        |              |                 |                | -0.55                             | 4.1e-02         | 32             | -4.79                                  |                 | 1              |
| Height | All           | -0.24        | 4.8e-02         | 103            | -0.33                             | 3.6e-02         | 77             | -0.15                                  | 1.8e-01         | 40             |
|        | Male          | -0.34        | 4.5e-02         | 52             | -0.4                              | 4.6e-02         | 43             | -0.29                                  | 1.2e-01         | 14             |
|        | Female        | -0.14        | 2.6e-01         | 51             | -0.24                             | 2.1e-01         | 34             | -0.07                                  | 3.7e-01         | 26             |
|        | Adult         | -0.01        | 4.8e-01         | 47             | 0.39                              | 7.1e-01         | 9              | -0.1                                   | 2.7e-01         | 38             |
|        | Male          | -0.13        | 3.4e-01         | 20             | 0.12                              | 5.6e-01         | 7              | -0.26                                  | 1.7e-01         | 13             |
|        | Female        | 0.08         | 6.3e-01         | 27             | 1.32                              | 7.2e-01         | 2              | -0.02                                  | 4.6e-01         | 25             |
|        | Pediatric <18 |              |                 |                | -0.42                             | <b>1.1e-02</b>  | 68             | -0.98                                  | 9.6e-02         | 2              |
|        | Male          |              |                 |                | -0.5                              | <b>2.0e-02</b>  | 36             | -0.67                                  |                 | 1              |
|        | Female        |              |                 |                | -0.33                             | 1.2e-01         | 32             | -1.28                                  |                 | 1              |

For the *p*-values, the following cutoffs control the false discovery rate (FDR) at 5%: BMI: 0.022, weight: 0.032 and height: 0.025 (all indicated in bold). Data were not available for all cases.

<sup>1</sup> Relatives were excluded if more than one member of the same family was present in the analysis to avoid relatedness

<sup>2</sup> These include 24 cases from the literature (Supplementary Table S3).

<sup>3</sup> Population based cases and first-degree relatives of probands



|     |  |     |   |   |   |                                                       |                            |                                                    |                                                      |   |
|-----|--|-----|---|---|---|-------------------------------------------------------|----------------------------|----------------------------------------------------|------------------------------------------------------|---|
| 137 |  |     |   |   |   | Feeding/eating disorder, gastrostomy                  | ASD, Hyperactivity, SD     |                                                    | GERD                                                 | + |
| 142 |  |     |   |   |   |                                                       |                            |                                                    | Constipation                                         | - |
| 143 |  |     | + | + |   |                                                       |                            |                                                    | Severe constipation, Hypermetropia                   | - |
| 164 |  |     | + |   |   |                                                       |                            | Hypospadias                                        |                                                      | + |
| 168 |  |     | + | + |   |                                                       | ADD                        |                                                    | Astigmatism. Constipation                            | - |
| 169 |  | 72  |   |   |   |                                                       |                            |                                                    | Severe constipation                                  | - |
| 170 |  |     |   | + |   |                                                       | Intolerance to frustration |                                                    | Strabismus                                           | + |
| 173 |  |     |   |   |   | Severe oroesophageal dysphagia in the neonatal period |                            |                                                    |                                                      | + |
| 174 |  |     | + | + |   |                                                       |                            | Costal malformation, Capillary malformation (neck) | Asthma, night blindness, strabismus                  | - |
| 175 |  | 71  | - | + |   |                                                       | ADHD                       |                                                    | Recurrent otitis                                     | - |
| 176 |  |     | + |   | N |                                                       |                            |                                                    | G6PD deficiency, recurrent upper airways infections. | + |
| 177 |  | 71  | - | + |   |                                                       |                            |                                                    |                                                      | - |
| 178 |  | 104 | - | + |   |                                                       | ASD                        |                                                    |                                                      | - |
| 179 |  |     | - | + |   |                                                       | ASD, Anxiety, ADD          |                                                    |                                                      | - |
| 180 |  | 81  | + | + |   |                                                       | ASD, SD                    |                                                    |                                                      | - |
| 181 |  |     |   |   |   |                                                       |                            | Left branchial cleft                               |                                                      | - |
| 182 |  |     | + |   |   |                                                       |                            |                                                    |                                                      | - |





|     |   |       |   |   |  |                                                 |                           |                                                                |                                          |   |
|-----|---|-------|---|---|--|-------------------------------------------------|---------------------------|----------------------------------------------------------------|------------------------------------------|---|
| 259 |   | 70-80 |   |   |  |                                                 | ADHD                      | Unilateral auricular appendix. Inguinal hernia. Short frenulum | Hypermetropia. Strabismus                | - |
| 260 |   |       |   |   |  |                                                 |                           |                                                                | Strabismus                               | - |
| 262 |   | 57    | + | + |  |                                                 | Hyperactivity             |                                                                |                                          | - |
| 286 | + |       | + | + |  | Gastrostomy                                     | ASD                       | Atrial septal defect, micropenis, bilateral ectopic testes     | Constipation, deafness                   | + |
| 287 |   |       |   |   |  |                                                 |                           | Metopic craniosynostosis, ectopic testes. Inguinal hernia.     |                                          | - |
| 291 |   |       |   |   |  |                                                 |                           |                                                                |                                          | - |
| 292 |   |       | - | + |  |                                                 | ADHD                      |                                                                |                                          | - |
| 313 |   |       |   |   |  | Unspecified eating disorder                     | ADHD, aggressivity, SD    |                                                                | Refraction disorder                      | - |
| 314 |   |       | + | + |  | Very selective and restrictive eating behaviour |                           |                                                                |                                          | - |
| 315 |   |       |   |   |  |                                                 |                           |                                                                |                                          | - |
| 319 |   |       | + | + |  |                                                 | Aggressivity, impulsivity |                                                                |                                          | - |
| 322 | + |       | + | + |  |                                                 | ASD, aggressivity         |                                                                | Constipation, hypothyroidism, strabismus | + |
| 323 |   |       |   | + |  |                                                 |                           |                                                                |                                          | - |
| 324 |   |       | + | + |  |                                                 | Tantrum                   |                                                                |                                          | - |
| 346 | + |       | + | - |  | Feeding disorder in the neonatal period         | Aggressivity              |                                                                | Myopia                                   | + |
| 349 |   |       | + | + |  | Severe eating disorder                          |                           |                                                                |                                          | - |
| 356 |   |       |   |   |  |                                                 |                           | Unilateral ectopic testis                                      |                                          | - |

|     |   |    |   |   |   |  |              |                                                                                                             |                                       |   |
|-----|---|----|---|---|---|--|--------------|-------------------------------------------------------------------------------------------------------------|---------------------------------------|---|
| 357 |   | 74 |   |   |   |  | ADHD         |                                                                                                             | Myopia                                | - |
| 359 |   |    |   |   |   |  |              |                                                                                                             |                                       | - |
| 360 |   |    |   |   |   |  |              | Ectopic testis,<br>pectus<br>excavatum                                                                      |                                       | - |
| 361 |   |    |   |   |   |  |              |                                                                                                             | Delayed puberty                       | - |
| 362 | + |    | - | + |   |  | Aggressivity |                                                                                                             |                                       | - |
| 367 |   | 50 |   | + | N |  |              | Cleft lip and<br>palate.<br>Ventricular<br>septal defect.<br>Mild scoliosis.<br>Ectopic testes<br>operated. | Strabismus                            | - |
| 373 |   |    |   |   |   |  | Anxiety      |                                                                                                             |                                       | - |
| 385 | + |    |   | + |   |  |              |                                                                                                             | Joint<br>hypermobility,<br>pes planus | + |

<sup>1</sup> Medication inducing potential weight gain (psychotropic treatment & depakote)

<sup>2</sup> Intellectual quotient, developmental quotient (mild, moderate, severe)

<sup>3</sup> See online methods

GERD: gastroesophageal reflux disease

ADHD, ADD: attention-deficit hyperactivity disorder, Attention deficit disorder.

OCD: obsessive-compulsive disorder, SD: sleeping disorder

**Supplementary Table S7: Proportion of duplication carriers below 2 SD for height (HT), weight (WT), BMI and head circumference (HC) stratified by gender and age.**

|     | men 0-5     | men (5-10)   | men (10-18)   | men (>18)   |
|-----|-------------|--------------|---------------|-------------|
| HT  | 0.18        | 0.08         | 0.07          | 0.05        |
| WT  | 0.42        | 0.08         | 0.14          | 0.2         |
| BMI | 0.55        | 0.08         | 0.14          | 0.2         |
| HC  | 0.3         | 0.5          | 0.08          | 0.4         |
|     | women (0-5) | women (5-10) | women (10-18) | women (>18) |
| HT  | 0           | 0.29         | 0.14          | 0.04        |
| WT  | 0.17        | 0.25         | 0.23          | 0.04        |
| BMI | 0.08        | 0            | 0.23          | 0.07        |
| HC  | 0.25        | 0.29         | 0             | 0.25        |

**Supplementary Table S8: Effect of the duplication (A) and deletion (B) on head circumference (HC).**

| A          | HC in duplication carriers |                 |                | B    | HC in deletion carriers |                 |   |
|------------|----------------------------|-----------------|----------------|------|-------------------------|-----------------|---|
|            | Mean Z-score               | <i>p</i> -value | N <sup>1</sup> |      | Mean Z-score            | <i>p</i> -value | N |
| all        | -0.89                      | <b>7.8e-06</b>  | 67             | 0.57 | <b>1.79e-05</b>         | 115             |   |
| male       | -1.09                      | <b>1.7e-04</b>  | 36             | 0.68 | <b>9.2e-05</b>          | 77              |   |
| female     | -0.65                      | <b>8.5e-03</b>  | 31             | 0.33 | <b>4.03e-02</b>         | 38              |   |
| adult      | -1.84                      | <b>5.0e-04</b>  | 9              | 1.06 | <b>1.29e-02</b>         | 12              |   |
| male       | -1.92                      | <b>2.0e-02</b>  | 5              | 1.19 | <b>2.13e-02</b>         | 9               |   |
| female     | -1.74                      | <b>7.8e-03</b>  | 4              | 0.67 | 2.53e-01                | 3               |   |
| < 18 years | -0.85                      | <b>2.6e-05</b>  | 65             | 0.51 | <b>1.91e-04</b>         | 103             |   |
| male       | -1.02                      | <b>6.1e-04</b>  | 34             | 0.61 | <b>7.18e-04</b>         | 68              |   |
| female     | -0.65                      | <b>8.5e-03</b>  | 31             | 0.30 | 6.1e-02                 | 35              |   |

For the *p*-values, the following cutoff control the false discovery rate (FDR) at 5%: HC: 0.0472 (all indicated in bold).

<sup>1</sup> Relatives were excluded if more than one member of the same family was present in the analysis to avoid relatedness

**Supplementary Table S9: Malformations (A) and associated symptoms (B) present in duplication carriers ascertained for DD/ID**

| <b>CNS</b>                                                                                | <b>Visceral</b>            | <b>Cardiac</b>                  | <b>Uro-genital</b>   | <b>Cranio-facial</b>           | <b>Osteo-articular</b>                    |
|-------------------------------------------------------------------------------------------|----------------------------|---------------------------------|----------------------|--------------------------------|-------------------------------------------|
| Cerebellar cysts (n=2), cerebellar hypoplasia (n=2), abnormal cerebellar striations (n=2) | Inguinal hernia (n=3)      | Ventricular septal defect (n=1) | Hypospadias (n=2)    | Metopic craniosynostosis (n=1) | Scoliosis (n=4)                           |
| Corpus callosum agenesis (n=2), hypoplasia (n=1)                                          | Diaphragmatic hernia (n=2) | Atrial septal defect (n=2)      | Ectopic testis (n=7) | Cleft lip/palate (n=4)         | Costal malformations (n=1)                |
| Cortical dysplasia (n=2)                                                                  |                            | Pulmonary stenosis (n=1)        |                      |                                | Pectum excavatum (n=2) and carinatum(n=1) |
| Myelinisation delay (n=2)                                                                 |                            |                                 |                      |                                |                                           |

(A) Malformations in 29/101 patients (ascertained for ID/DD, relatives and literature cases included).

| <b>Neurological signs</b>                                                          | <b>Ophthalmologic</b>        | <b>Visceral</b>              | <b>Others</b>           |
|------------------------------------------------------------------------------------|------------------------------|------------------------------|-------------------------|
| Hypotonia (19)                                                                     | Refraction abnormalities (7) | Constipation (10)            | Joint hypermobility (4) |
| Pyramidal signs (6)                                                                | Pigmentary retinitis (1)     | Meconial ileus (1)           | Asthma (5)              |
| Cerebellar signs (2)                                                               | Strabismus (8)               | Gastro-esophageal reflux (2) | Delayed puberty (1)     |
| Extra-pyramidal signs (2)                                                          |                              |                              |                         |
| Epilepsy<br>- Unspecified (12)<br>- Febrile convulsions (4)<br>- West syndrome (3) |                              |                              |                         |
| <b>Total: 48</b>                                                                   | <b>Total: 16</b>             | <b>Total: 13</b>             | <b>Total: 10</b>        |

(B) Symptoms in 58/101 patients (ascertained for ID/DD, relatives and literature cases included).

Supplementary Table S10: MLPA assays

| Probe Name           | Status  | Gene             | Chr. | Start     | End       | Band         | Size (bp) |
|----------------------|---------|------------------|------|-----------|-----------|--------------|-----------|
| <b>chr1_c1orf159</b> | Control | <i>C1orf159</i>  | 1    | 1009320   | 1009370   | 1P36.33      | 138       |
| <b>chr1_193_M</b>    | Control | <i>MRTO4</i>     | 1    | 19457558  | 19457612  | 1p36.13      | 99        |
| <b>XPO6</b>          | Test    | <i>XPO6</i>      | 16   | 28017393  | 28017455  | 16p11.2      | 126       |
| <b>APOB48R</b>       | Test    | <i>APOB48R</i>   | 16   | 28414594  | 28414648  | 16p11.2      | 132       |
| <b>ATXN2L</b>        | Test    | <i>ATXN2L</i>    | 16   | 28745049  | 28745104  | 16p11.2      | 102       |
| <b>SH2B1</b>         | Test    | <i>SH2B1</i>     | 16   | 28791397  | 28791453  | 16p11.2      | 105       |
| <b>SPNS1</b>         | Test    | <i>LAT/SPNS1</i> | 16   | 28898026  | 28898079  | 16p11.2      | 93        |
| <b>RUNDC2C</b>       | Test    | <i>RUNDC2D2</i>  | 16   | 29221888  | 29221941  | 16p11.2      | 96        |
| <b>QPRT</b>          | Test    | <i>QPRT</i>      | 16   | 29616204  | 29616262  | 16p11.2      | 111       |
| <b>HIRIP3</b>        | Test    | <i>HIRIP3</i>    | 16   | 29912953  | 29913010  | 16p11.2      | 114       |
| <b>MAPK3</b>         | Test    | <i>MAPK3</i>     | 16   | 30036029  | 30036089  | 16p11.2      | 117       |
| <b>CD2BP2</b>        | Control | <i>CD2BP2</i>    | 16   | 30271431  | 30271491  | 16p11.2      | 123       |
| <b>chr19_575_Z2</b>  | Control | <i>ZNF528</i>    | 19   | 57609990  | 57610037  | 19q13.4<br>1 | 90        |
| <b>ZWINT</b>         | Control | <i>ZWINT</i>     | 10   | 57789521  | 57789580  | 10q21.1      | 120       |
| <b>chr11_CNTCN5</b>  | Control | <i>CNTCN5</i>    | 11   | 99378017  | 99378076  | 11q22.1      | 129       |
| <b>chr6_161_1P</b>   | Control | <i>PARK2</i>     | 6    | 161766507 | 161766563 | 6q26         | 108       |
| <b>chr1_238_P</b>    | Control | <i>PLD5</i>      | 1    | 240622416 | 240622475 | 1q43         | 135       |

**Supplementary Table S11: Primers used for quantitative PCR assays**

| Gene                                               | RefSeq Number | Chromosome co-ordinates* |   | Oligonucleotide Sequence 5'-3' |
|----------------------------------------------------|---------------|--------------------------|---|--------------------------------|
| Genes mapping telomeric to the rearranged interval |               |                          |   |                                |
| IL4R                                               | NM_001008699  | chr16:27232752-27274031  | F | TTTTCTGCTCTCCGAAGCCC           |
|                                                    |               |                          | R | GCGCCTCCGTTGTTCTCAG            |
| CLN3                                               | NM_000086     | chr16:28396102-28410717  | F | AGTCACGCTCAGCAATACCGC          |
|                                                    |               |                          | R | GACGCCAGCCTGGTACAGC            |
| ATXN2L                                             | NM_148416     | chr16:28741915-28756057  | F | ATTTCCAGGAGGAGCCGATGA          |
|                                                    |               |                          | R | CGCGGCCAGGACAATCTTC            |
| SH2B                                               | NM_015503     | chr16:28782815-28793027  | F | TCCTGCACCTCATGCC               |
|                                                    |               |                          | R | GAGGTGGTTCGGTTACACAGTCACT      |
| LAT                                                | NM_014387     | chr16:28903888-28909597  | F | AAGACTGAGCCTGCCGCC             |
|                                                    |               |                          | R | CCTCTTCTCCACTTCTCTG            |
| Genes mapping within the rearranged interval       |               |                          |   |                                |
| QPRT                                               | NM_014298     | chr16:29597942-29616813  | F | CTCCAGTGCCCAAATCCAC            |
|                                                    |               |                          | R | GCCGGTGTATCTCTTCC              |
| MAZ                                                | NM_002383     | chr16:29725514-29729986  | F | GGATCAGAGCTGTCCCAAAGAG         |
|                                                    |               |                          | R | CTGCCCTCCTCAAACCTC             |
| PPRT2                                              | NM_145239     | chr16:29730910-29734703  | F | CTCCCGTACCGTTTACTCTG           |
|                                                    |               |                          | R | CCAAGCCTCGTCTAAGTGCTGT         |
| C16orf53                                           | NM_024516     | chr16:29735333-29738935  | F | GGTCTCTCCCGGAACTTAG            |
|                                                    |               |                          | R | TTTGCAGGCCTCACTTCTGAC          |
| MVP                                                | NM_017458     | chr16:29739289-29766843  | F | GCCTTGCCATTGAAACG              |
|                                                    |               |                          | R | TCGGACCTTCTGGACCTCT            |
| CDIPT                                              | NM_006319     | chr16:29777180-29782012  | F | TTTCTCTGAGGGACCTTTAGTTGG       |
|                                                    |               |                          | R | AGGCCATCCGGAACAGT              |
| SEZ6L                                              | NM_201575     | chr16:29790332-29818074  | F | GTGGAGTCGGACTTCAGCAAC          |
|                                                    |               |                          | R | CTCCCGGTATCCCCAG               |
| KCTD13                                             | NM_178863     | chr16:29825161-29845046  | F | GGCCTGATTGAGGACTGCC            |
|                                                    |               |                          | R | CAGCGTCTCCCTTTTTTGT            |
| TMEM219                                            | NM_194280     | chr16:29880852-29891874  | F | GTCTCACGTCGTGGGCTTG            |
|                                                    |               |                          | R | TCTGGACCGTCTCCGAAGTT           |
| TAOK2                                              | NM_004783     | chr16:29892723-29911082  | F | CCTTCGGACCTCTAGACAGGC          |
|                                                    |               |                          | R | TGACTGCTGGACTCCACAGCT          |
| HIRIP3                                             | NM_003609     | chr16:29911818-29914888  | F | ATCATCAGTGGCTCGGGC             |
|                                                    |               |                          | R | TCCTAAAGGGTTCCAGGCTGT          |
| DOC2A                                              | NM_003586     | chr16:29924336-29929902  | F | TGGACGTCAACGGTTACTCG           |
|                                                    |               |                          | R | CGGGCCTCAGGTACGTCTT            |
| FAM57B                                             | NM_031478     | chr16:29943250-29949405  | F | CCTGCCATGTCCCTGGTG             |
|                                                    |               |                          | R | CCCAGATTGGAGGAAGCCTT           |
| PPP4C                                              | NM_002720     | chr16:29994885-30004196  | F | GTGTGCGGCGACATCCA              |
|                                                    |               |                          | R | GACGTGCCACCTACTCTGAAC          |
| INO80E                                             | NM_173618     | chr16:30007531-30017112  | F | ACTTTCGGACTCAGATGCCAC          |
|                                                    |               |                          | R | CCTCCGTCTCGCTGTTATCTGAT        |
| YPEL3                                              | NM_031477     | chr16:30011136-30015022  | F | TGCGAGAACTGCAAGACCAC           |
|                                                    |               |                          | R | TGCTCTCAAAGGCCTGTTTCATAT       |
| GDPD3                                              | NM_024307     | chr16:30023633-30032359  | F | TTTACTTCTCTCCAGGCCACTTTG       |
|                                                    |               |                          | R | GAACCATGCGCCGGTCT              |
| MAPK3                                              | NM_002746     | chr16:30032928-30042039  | F | AGATCATGCTGAACTCCAAGGG         |
|                                                    |               |                          | R | CACAGACCAGATGTCGATGGAC         |
| CORO1A                                             | NM_007074     | chr16:30102449-30107898  | F | GGAGGTGTGAGCCCATTGC            |

|                                                      |           |                          |   |                                    |
|------------------------------------------------------|-----------|--------------------------|---|------------------------------------|
|                                                      |           |                          | R | TGGAACAGGTCCGACTTTCG               |
| Genes mapping centromeric to the rearranged interval |           |                          |   |                                    |
| SEPT1                                                | NM_052838 | chr16:30296958-30301672  | F | CGTGGAGGTGGAGAACCCAC               |
|                                                      |           |                          | R | CATCCGTCGCAGGTCAGG                 |
| ZNF688                                               | NM_145271 | chr16:30488526-30490508  | F | AAAGACTGGGAGGAGCTCGG               |
|                                                      |           |                          | R | CCTCTTCCTTCCTGTTTGGGAC             |
| BCL7C                                                | NM_004765 | chr16:30806619-30812900  | F | GAGAAGGTCCGGAGATGGGAGA             |
|                                                      |           |                          | R | GGAAGTGTGCGCCACAGTCAC              |
| Normalizing genes                                    |           |                          |   |                                    |
| Hs<br><i>EEF1A1</i>                                  | NM_001402 | chr6:74283962-74287475   | F | CTGAACCATCCAGGCCAAAT               |
|                                                      |           |                          | R | GCCGTGTGGCAATCCAAT                 |
| Hs <i>RPL13</i>                                      | NM_033251 | chr16:88154632-88157349  | F | AGGTATGCTGCCCCACAAA                |
|                                                      |           |                          | R | TGCCGTCAAACACCTTGAGA               |
| Hs <i>GUSB</i>                                       | NM_000181 | chr7:64869825-64891346   | F | CCACCAGGGACCATCCAAT                |
|                                                      |           |                          | R | AGTCAAAAATATGTGTTCTGGACAA<br>AGTAA |
| Hs <i>TBP</i>                                        | NM_003194 | chr6:170781103-170799578 | F | GCCCGAAACGCCGAATATA                |
|                                                      |           |                          | R | CGTGGCTCTCTTATCCTCATGA             |

- From UCSC Genome Browser, Human May 2004 (NCBI35/hg17) Assembly

**Supplementary Table S12: Cell lines used for gene expression analysis**

| Cell Line Name       | Sex | Age |
|----------------------|-----|-----|
| <b>Deletions:</b>    |     |     |
| BOCOL                | F   | 12  |
| DEDAV                | M   | 35  |
| DEFRA                | F   | 31  |
| LESAN                | F   | 38  |
| VUCAT                | F   | 43  |
| VULOI                | M   | 19  |
| <b>Duplications:</b> |     |     |
| BONAD                | F   | 8   |
| DAANA                | F   | 17  |
| DASYL                | F   | 50  |
| FRANG                | F   | 9   |
| FRPAT                | F   | 44  |
| <b>Controls*:</b>    |     |     |
| GM12042              | F   | 10  |
| GM12148              | M   | 34  |
| GM11983              | F   | 29  |
| GM10847              | F   | 38  |
| GM10859              | F   | 41  |
| GM13072              | F   | 4   |
| GM07694              | F   | 17  |
| TILSHA               | F   | 57  |
| GM07010              | F   | 8   |
| GM07348              | F   | 45  |

\*Cell lines with a GM prefix were obtained from Coriell Institute for Medical Research (<http://www.coriell.org/>)

**Supplementary Table S13: mRNA levels of genes at the 16p11.2 locus**

|              | Mean Relative Gene Expression (Standard Error) |                  |                   |
|--------------|------------------------------------------------|------------------|-------------------|
|              | Telomeric genes                                | Genes within CNV | Centromeric genes |
| Controls     | 0.83 (0.06)                                    | 1.02 (0.03)      | 0.95 (0.02)       |
| Deletions    | 1.35 (0.12)                                    | 0.68 (0.02)      | 1.07 (0.07)       |
| Duplications | 2.49 (1.12)                                    | 2.18 (0.09)      | 1.24 (0.01)       |
|              | Excluding <i>LAT</i> outlier:<br>1.48 (0.11)   |                  |                   |



**Supplementary Figure S1: Effect of the 16p11.2 deletion on BMI.**

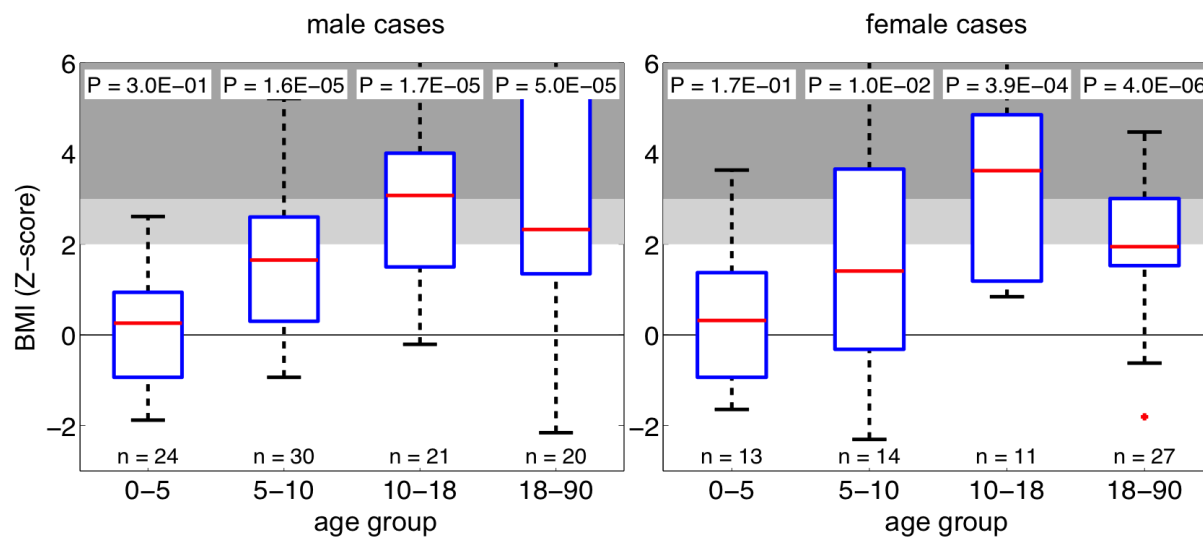

Legend: Z-score values of 16p11.2 deletion carriers' BMI stratified by age group. Abscise: age groups in years. Boxplots represent the 5th, 25th, median, 75th and 95th percentile for each age group. Light and dark grey represent +2 and +3 SD respectively.

### Supplementary Figure S2: Effect of the 16p11.2 duplication on weight and height.

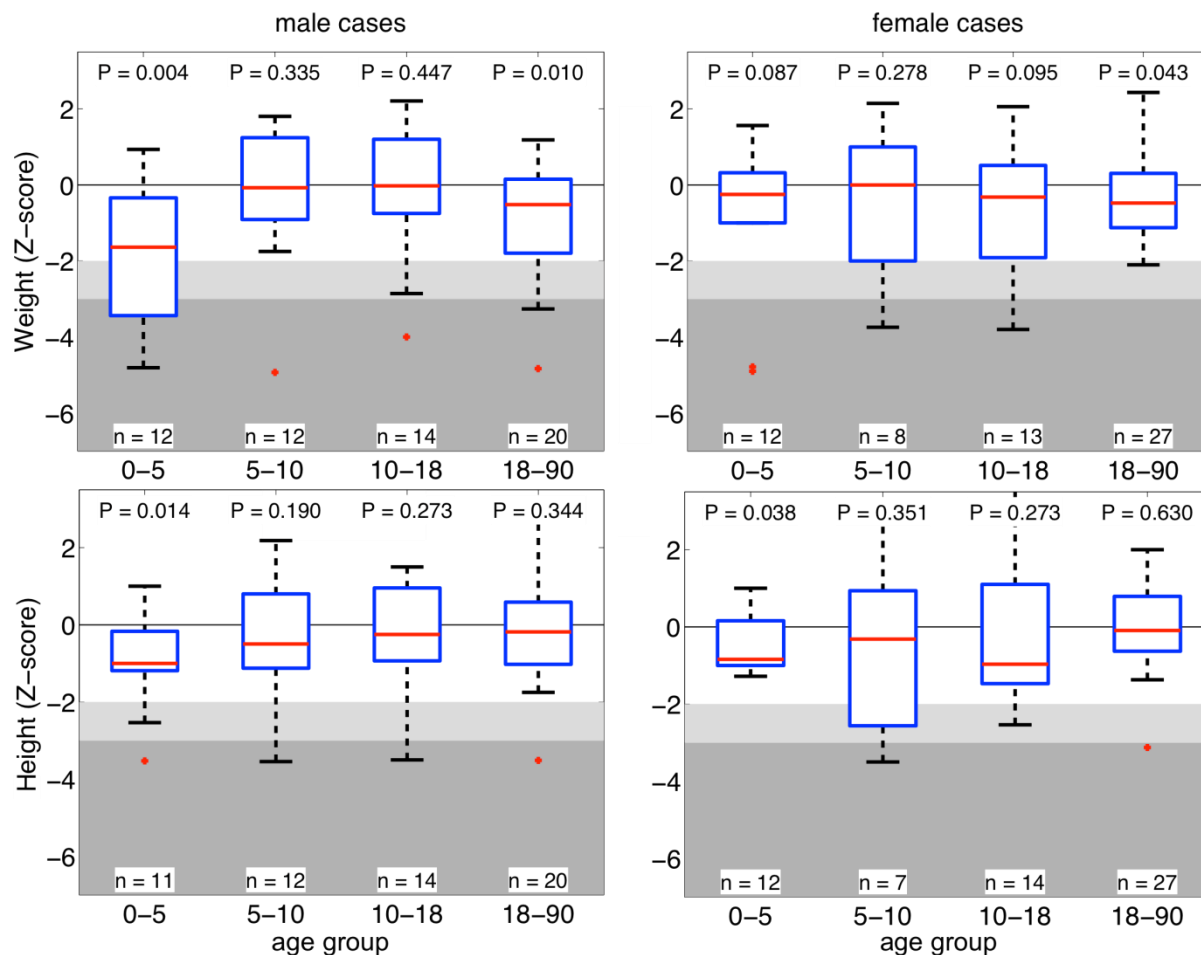

Legend: Z-score values of weight (top row panels) and height (bottom row panels) of 16p11.2 duplication carriers stratified by age group. Abscise: age groups in years. Boxplots represent the 5th, 25th, median, 75th and 95th percentile for each age group. Light grey and dark grey represent -2 and -3 SD respectively.

**Supplementary Figure S3: Effect of the 16p11.2 CNV on head circumference (HC) in carriers of the both rearrangements.**

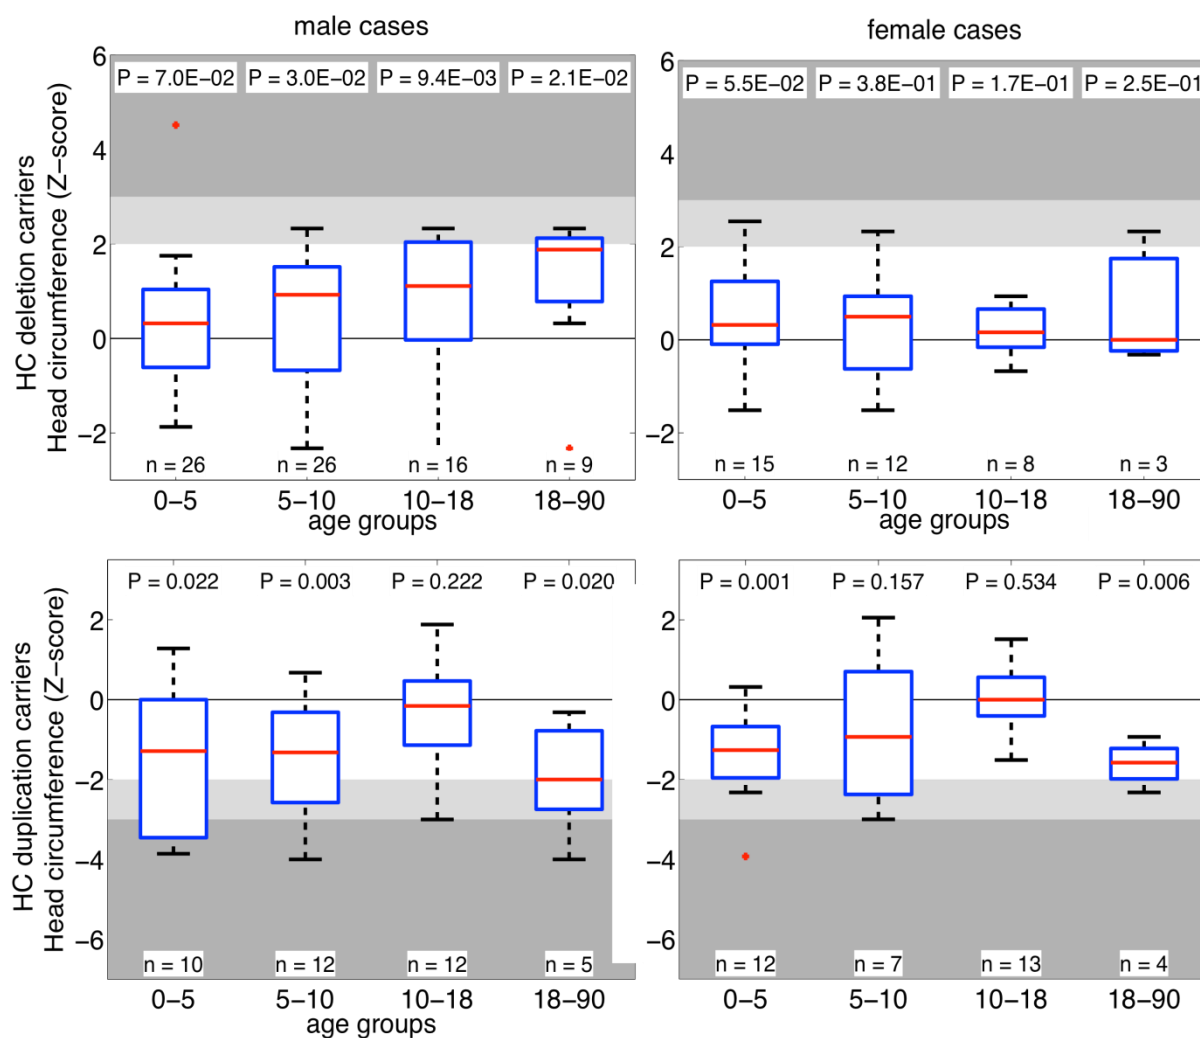

Legend: Z-score values of head circumference (HC) of 16p11.2 deletion (top row panels) and duplication (bottom row panels) carriers stratified by age group. Abscise: age groups in years. Boxplots represent the 5th, 25th, median, 75th and 95th percentile for each age group. Light and dark grey background represent the 2<sup>nd</sup> and 3<sup>rd</sup> SD. Macrocephaly and microcephaly are clearly present in deletion and duplication carriers respectively.

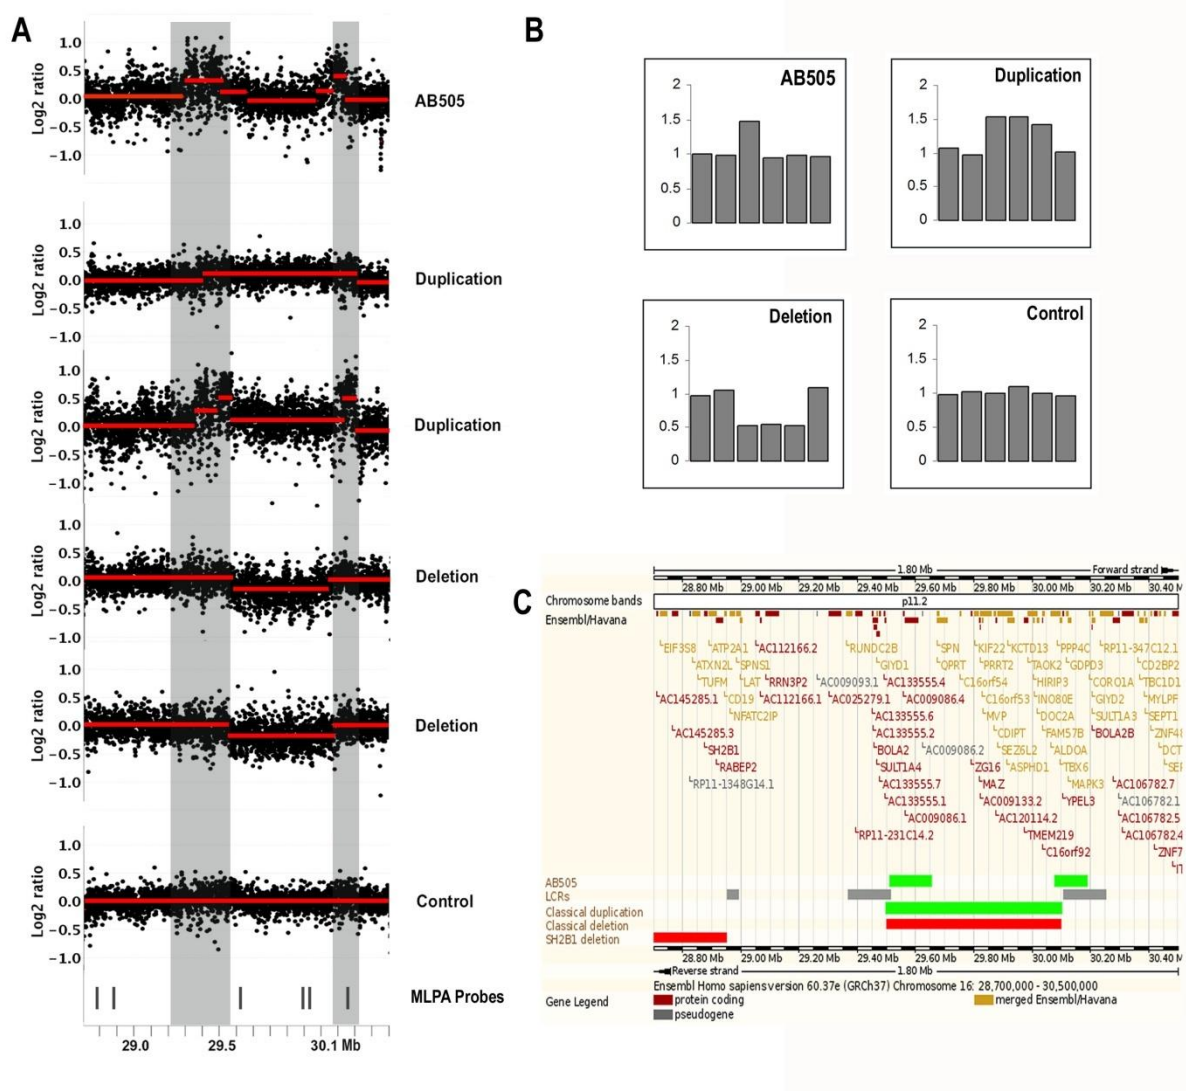

### Supplementary Figure S4: aCGH and MLPA of the 16p11.2 region

(A) Examples of custom-array CGH results for the 16p11.2 region from 28.7 to 30.5 Mb. Anorexic case AB505, two duplication cases, two deletion cases and a control case are shown from top to bottom. Grey bars indicate the location of the low copy repeats (LCRs) situated either side of the rearranged interval. (B) Gene dosage for 6 MLPA probes. Probe location is shown by grey bars at the bottom of A. (C) Ensembl screenshot of the genes mapping within the 16p11.2 area. The tracks at the bottom specify the extent of the duplications in anorexic case AB505 (green) (16:29,514,638-29,650,991), the LCRs (grey), the extent of the classical deletion (green) and duplication (red) and the smaller 200 kb deletion situated around the *SH2B1* gene<sup>18</sup> (red).

## References

1. Olsen, E.M. *et al.* Failure to thrive: the prevalence and concurrence of anthropometric criteria in a general infant population. *Arch Dis Child* **92**, 109-14 (2007).
2. Wang, K. *et al.* Large copy-number variations are enriched in cases with moderate to extreme obesity. *Diabetes* **59**, 2690-4 (2010).
3. Girirajan, S. & Eichler, E.E. Phenotypic variability and genetic susceptibility to genomic disorders. *Hum Mol Genet* **19**, R176-87.
4. Girirajan, S. *et al.* A recurrent 16p12.1 microdeletion supports a two-hit model for severe developmental delay. *Nat Genet* **42**, 203-9.
5. Howald, C. *et al.* Two high throughput technologies to detect segmental aneuploidies identify new Williams-Beuren syndrome patients with atypical deletions. *J Med Genet* **43**, 266-73 (2006).
6. Conrad, D.F. *et al.* Origins and functional impact of copy number variation in the human genome. *Nature* **464**, 704-12 (2010).
7. First, M.B., Spitzer, R.L. & Williams, J.B.W. *Structured Clinical Interview for DSM-IV (SCID-I): Users Guide and Interview, Research Version*, (Biometrics Research Department, New York Psychiatric Institute, New York, 1995).
8. Fernandez, B.A. *et al.* Phenotypic Spectrum Associated with De Novo and Inherited Deletions and Duplications at 16p11.2 in Individuals Ascertained for Diagnosis of Autism Spectrum Disorder. *J Med Genet* (2009).
9. Weiss, L.A. *et al.* Association between microdeletion and microduplication at 16p11.2 and autism. *N Engl J Med* **358**, 667-75 (2008).
10. McCarthy, S.E. *et al.* Microduplications of 16p11.2 are associated with schizophrenia. *Nat Genet* **41**, 1223-7 (2009).
11. Shinawi, M. *et al.* Recurrent reciprocal 16p11.2 rearrangements associated with global developmental delay, behavioral problems, dysmorphism, epilepsy, and abnormal head size. *J Med Genet* (2009).
